# Supplementary material
Source: publisher figshare collection journal article supplement (https://frontiersin.figshare.com/ndownloader/files/26537495)
Supplement: Supplementary file [file 26537495]

## Supplementary figure 2:

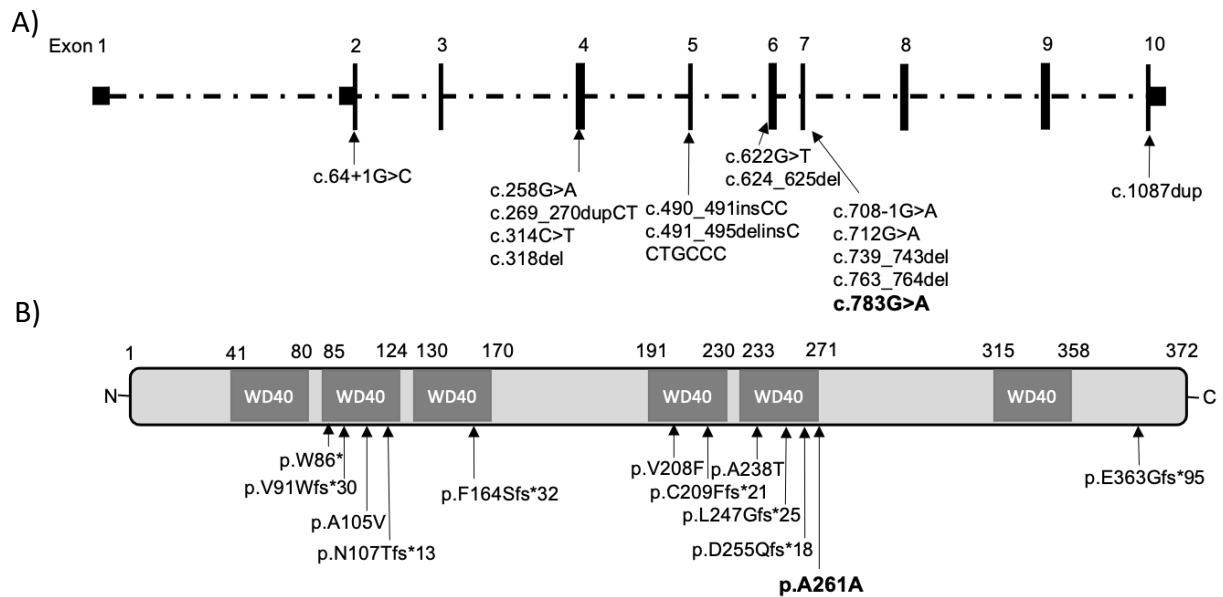

A) Nucleotide positions of identified causative variants relative to ARPC1B coding exons (NM\_005720.3). Two splice site, 3 missense, 1 nonsense and 8 frameshift variants have been identified until today. Variant in bold is the identified variant in present study. B) ARPC1B has 6 WD40 repeat domains forming a  $\beta$ -propeller required for Arp2/3 complex function. At the protein level there is no amino-acid change, however the sequencing analysis of the cDNA analysis products indicated that the variant creates a stop codon and therefore a truncated 236 amino acid protein NP\_005711.1:p.(Val237\*).
